# Supplementary material
Source: publisher figshare collection journal article supplement (https://acs.figshare.com/ndownloader/files/21359616)
Supplement: Supplementary file 1 [file 21359616]

## **Supporting Information**

### **Yttrium Oxide as a Strongly Adsorbing but Non-quenching Surface for DNA Oligonucleotides**

Yangyang Chang,<sup>a,b</sup> Biwu Liu,<sup>b</sup> Zhicheng Huang,<sup>b</sup> Yibo Liu,<sup>b</sup> Meng Liu<sup>a</sup> and Juewen  
Liu<sup>b\*</sup>

a. School of Environmental Science and Technology, Key Laboratory of Industrial Ecology and Environmental Engineering (Ministry of Education), Dalian University of Technology, Dalian 116024, China

b. Department of Chemistry, Waterloo Institute for Nanotechnology, University of Waterloo, Waterloo, Ontario N2L 3G1, Canada.

Email: liujw@uwaterloo.ca

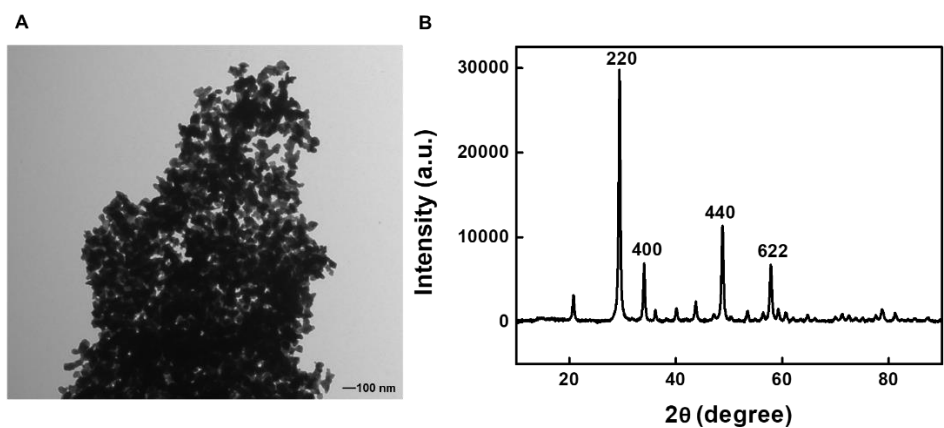

**Figure S1** (A) A TEM micrograph, and (B) XRD pattern of the  $\text{Y}_2\text{O}_3$  nanoparticles used in this work.

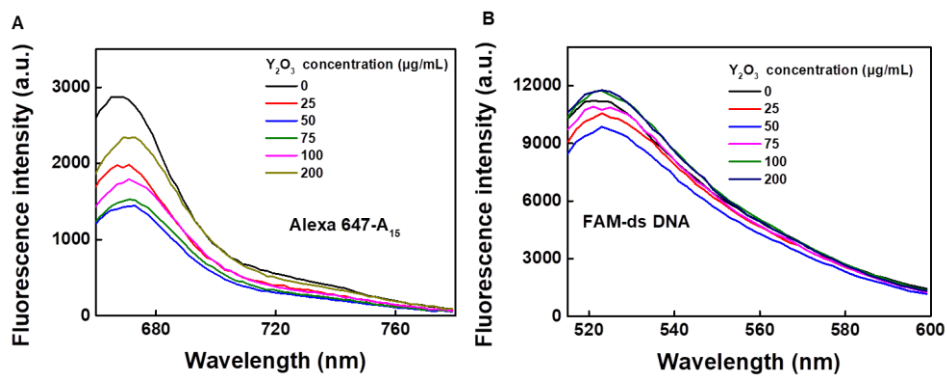

**Figure S2** Fluorescence spectra of (A) Alexa 647- $\text{A}_{15}$  and (B) FAM-ds DNA at different concentrations of  $\text{Y}_2\text{O}_3$  at pH 7.6 (HEPES, 10 mM).

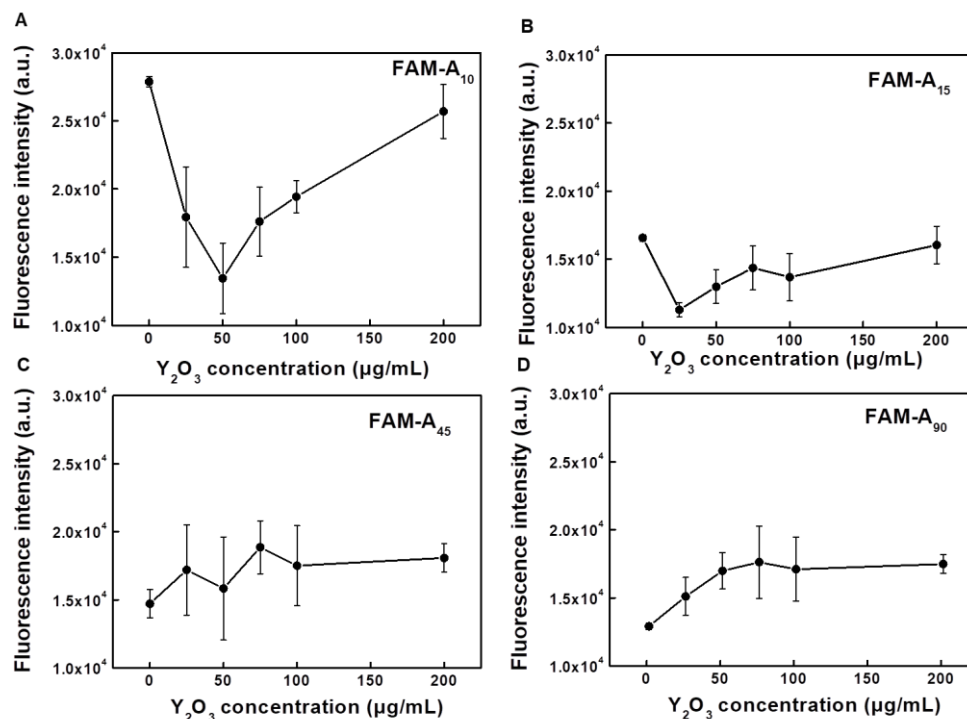

**Figure S3** Comparisons of fluorescence intensity of FAM labeled poly-A DNA sequences (20 nM) with different lengths at different concentrations of  $Y_2O_3$  ( $\lambda_{em} = 520$  nm) at pH 7.6 (HEPES, 10 mM).

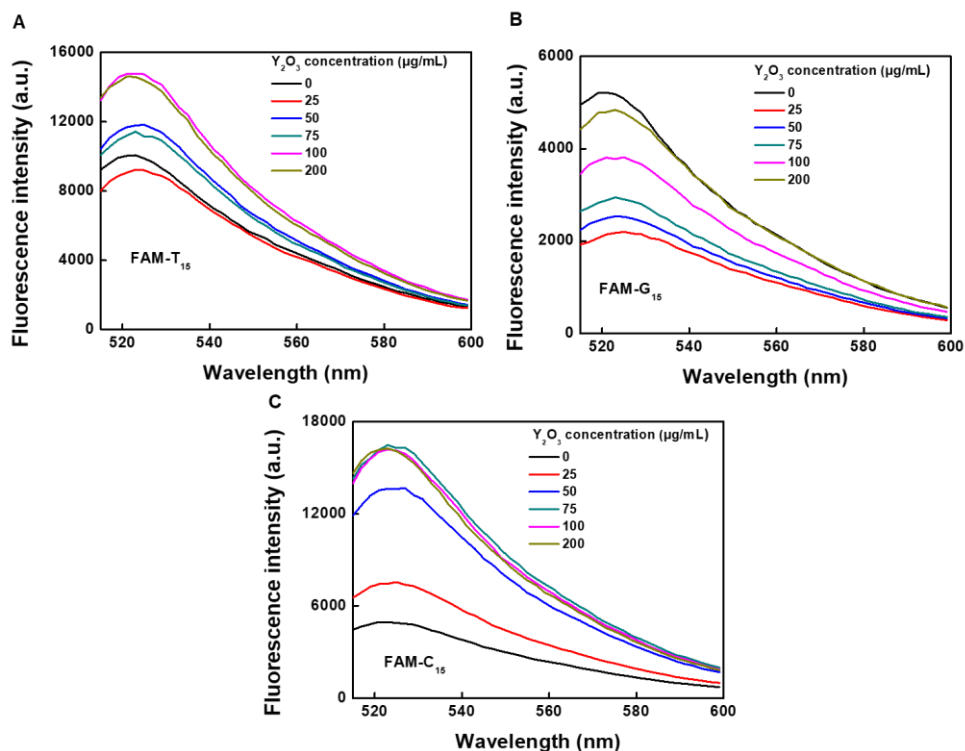

**Figure S4** Fluorescence spectra of 20 nM (A) FAM-T<sub>15</sub> (B) FAM-G<sub>15</sub> (C) FAM-C<sub>15</sub> with the addition of different concentrations of  $Y_2O_3$  at pH 7.6 (HEPES, 10 mM).

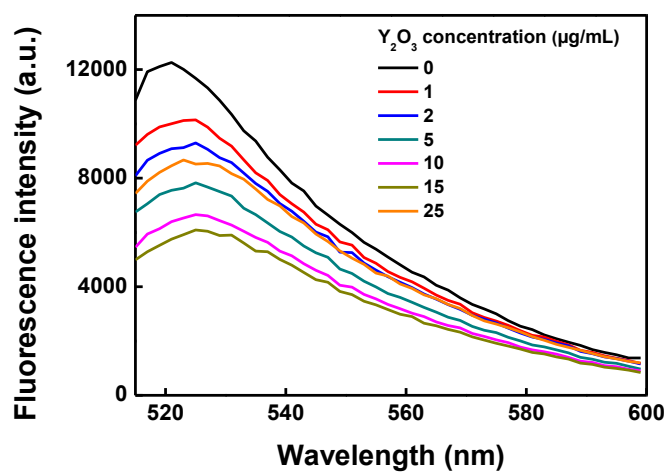

**Figure S5** Fluorescence spectra of 20 nM FAM-A<sub>15</sub> in the presence of low concentrations of Y<sub>2</sub>O<sub>3</sub> at pH 7.6 (HEPES, 10 mM). Most quenching was observed with 15 µg/mL Y<sub>2</sub>O<sub>3</sub>.

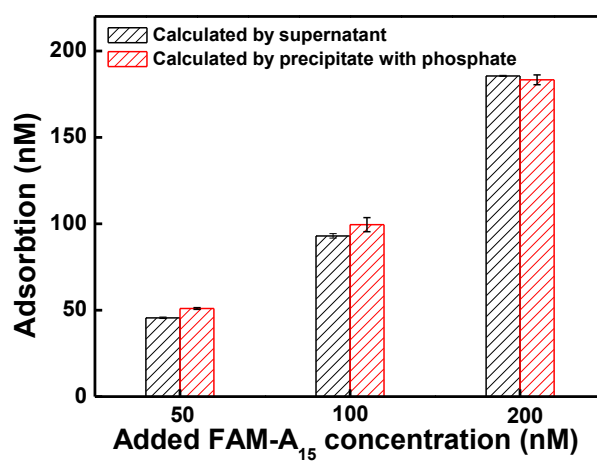

**Figure S6** A comparison of adsorbed DNA calculated by measuring DNA in the supernatant or released DNA from the precipitate.

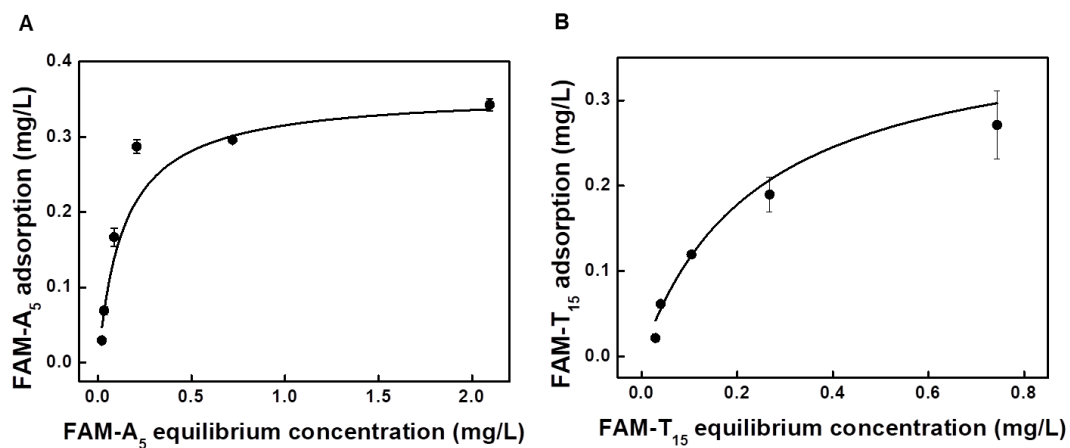

**Figure S7** The adsorption isotherm of (A) FAM-A<sub>5</sub> and (B) FAM-T<sub>15</sub> on Y<sub>2</sub>O<sub>3</sub> (50 µg/mL) at pH 7.6 (HEPES, 10 mM).

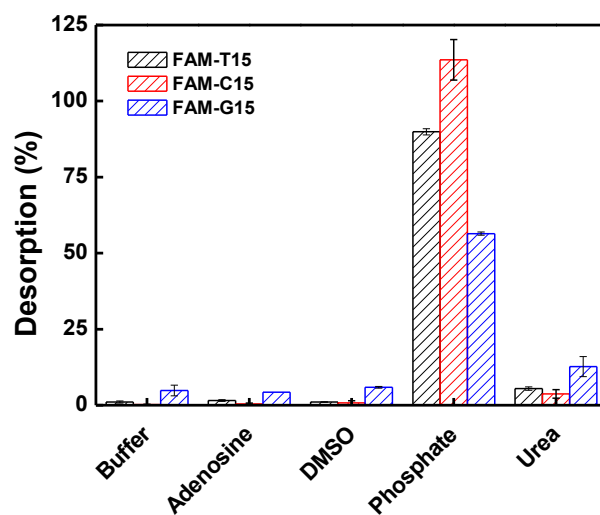

**Figure S8** The desorption percentage of FAM-T<sub>15</sub>, FAM-C<sub>15</sub> and FAM-G<sub>15</sub> from Y<sub>2</sub>O<sub>3</sub> (200 µg/mL) after adding buffer, and the buffer with 1 mM adenosine, 5 mM phosphate, 4 M urea, or 50% DMSO at pH 7.6 (HEPES, 10 mM).

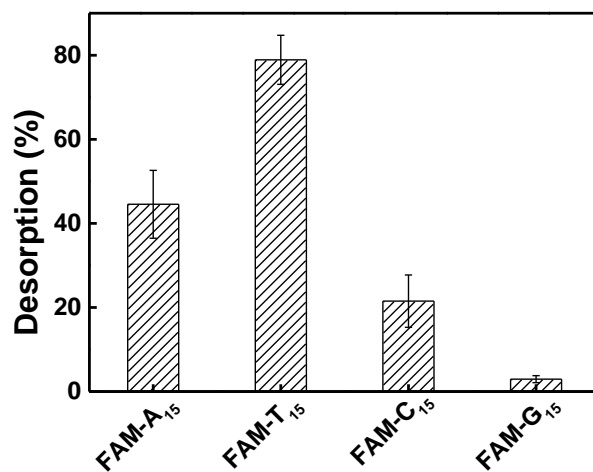

**Figure S9** The desorption percentage of FAM-A<sub>15</sub>, FAM-T<sub>15</sub>, FAM-C<sub>15</sub> and FAM-G<sub>15</sub> from Y<sub>2</sub>O<sub>3</sub> (200 µg/mL) after adding 100 µM phosphate at pH 7.6 (HEPES, 10 mM).

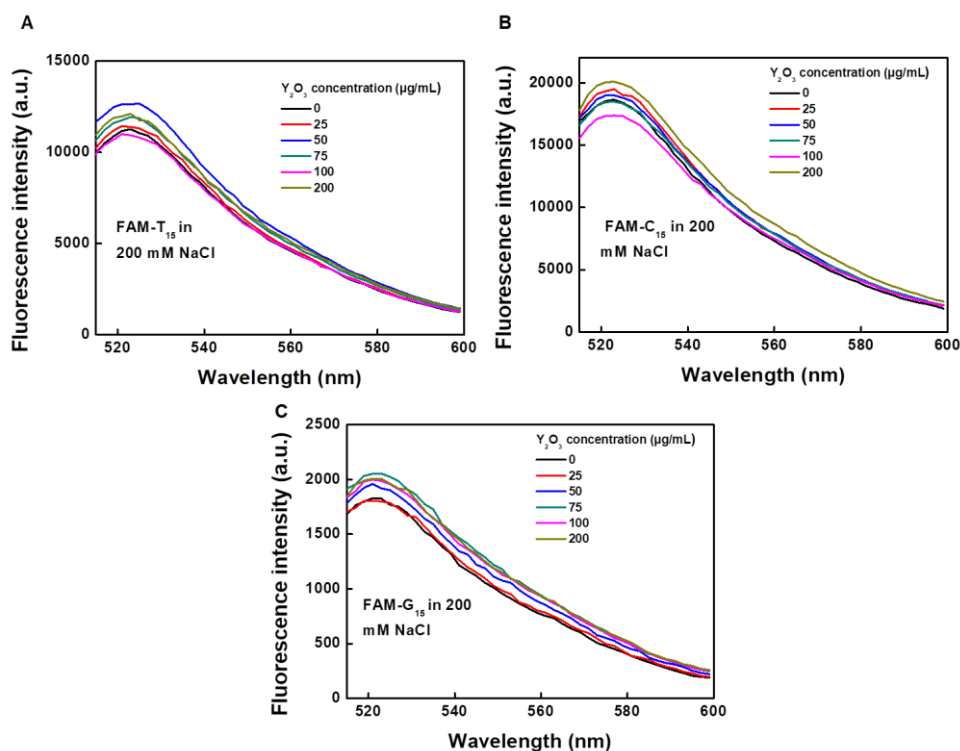

**Figure S10** Fluorescence spectra of (A) FAM-T<sub>15</sub> (B) FAM-C<sub>15</sub> (C) FAM-G<sub>15</sub> at different concentrations of Y<sub>2</sub>O<sub>3</sub> in high salt buffer (NaCl, 200 mM) at pH 7.6 (HEPES, 10 mM).

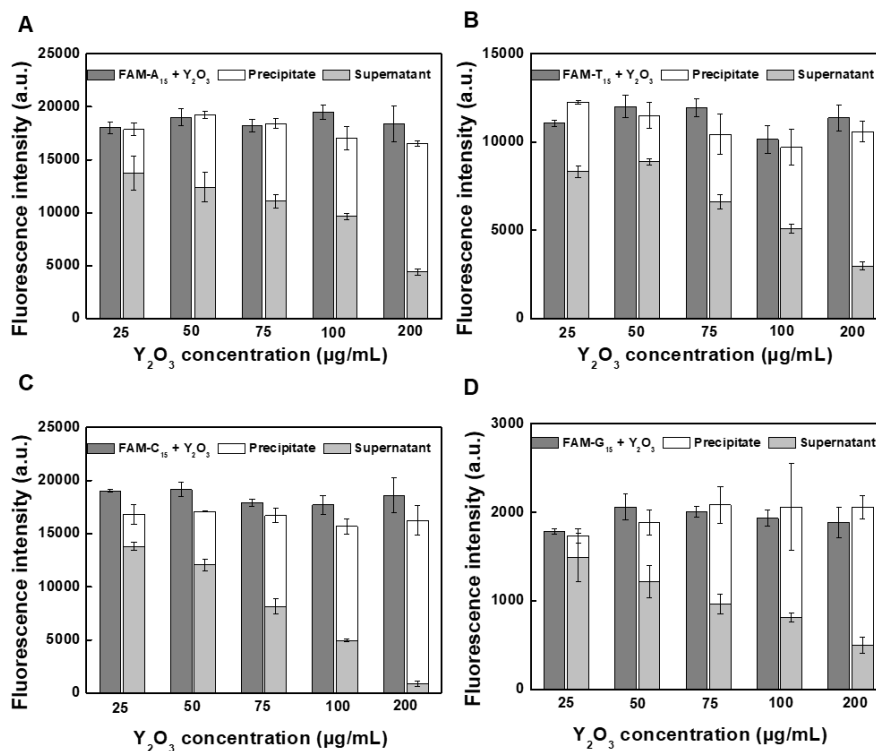

**Figure S11** A comparison of the fluorescence intensity of the FAM-DNA ((A) FAM-A<sub>15</sub>; (B) FAM-T<sub>15</sub>; (C) FAM-C<sub>15</sub>; (D) FAM-G<sub>15</sub>) at different concentrations of Y<sub>2</sub>O<sub>3</sub> in high salt buffer (NaCl, 200 mM) at pH 7.6 (HEPES, 10 mM).

FAM-T<sub>15</sub> (C) FAM-C<sub>15</sub>; (D) FAM-G<sub>15</sub>) and Y<sub>2</sub>O<sub>3</sub> mixture before and after centrifugation in high salt buffer (NaCl, 200 mM) at pH 7.6 (HEPES, 10 mM). The sum of the re-dispersed precipitates and the supernatants was a constant value indicating no quenching. Interestingly, most efficient adsorption was observed with FAM-C<sub>15</sub> in this high salt buffer, consistent with its strong adsorption affinity on many surfaces.

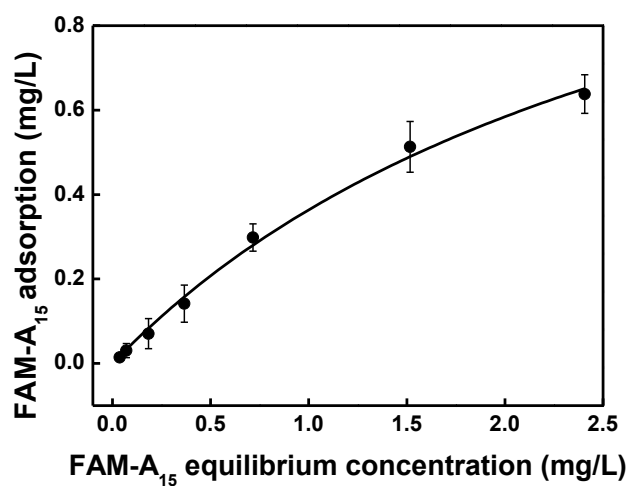

**Figure S12** Adsorption isotherm of Y<sub>2</sub>O<sub>3</sub> (50 µg/mL) for FAM-A<sub>15</sub> in 200 mM NaCl at pH 7.6 (HEPES, 10 mM).
